# Supplementary material for: Bioinformatics-based Screening of Key Genes for Saponin Metabolism in Quinoa
Source: Research Square preprint supplement (doi:10.21203/rs.3.rs-139481/v1), 2021-01-07
Supplement: Supplementary file 1 [file 1fedf6871f5d90430f78fa6f.docx]

**Supplementary Material**

**Bioinformatics-based Screening of Key Genes for Saponin Metabolism in Quinoa**

**Chengang Guo1, †, Zhimin Wei2****, †, Wei lyu3, *, Yanlou Geng3, ***

***1***Shandong Provincial Key Laboratory of Biophysics, Institute of Biophysics, Dezhou University, Dezhou 253023, China

***2*** Institute of Millet Crops, Hebei Academy of Agriculture and Forestry Sciences, Cereal Crops Research Laboratory of Hebei Province, National Foxtail Millet Improvement Center, Shijiazhuang 050035, China

**3** National Semi-Arid Agriculture Engineering Technology Research Center, Shijiazhuang 050051, China

*****corresponding author

**†**these authors contributed equally to this work


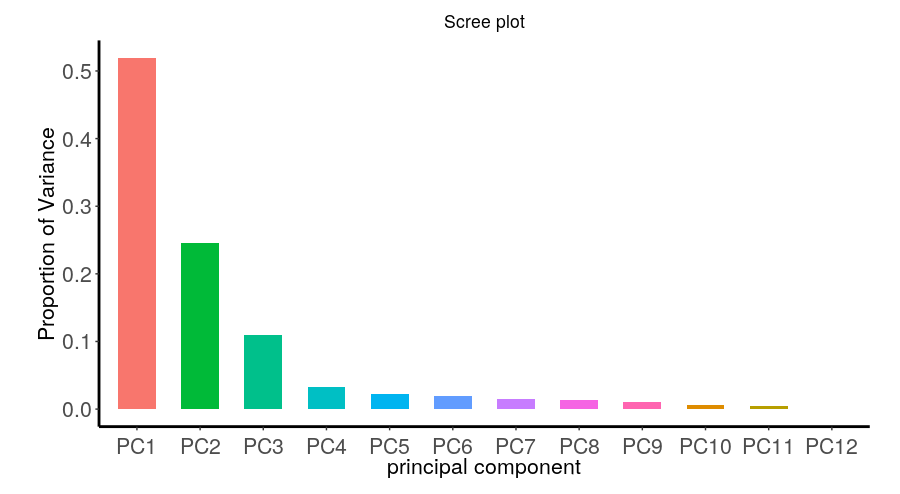


**Figure S1.** Scree plot of principal component analysis for 1734 differentially expressed genes.


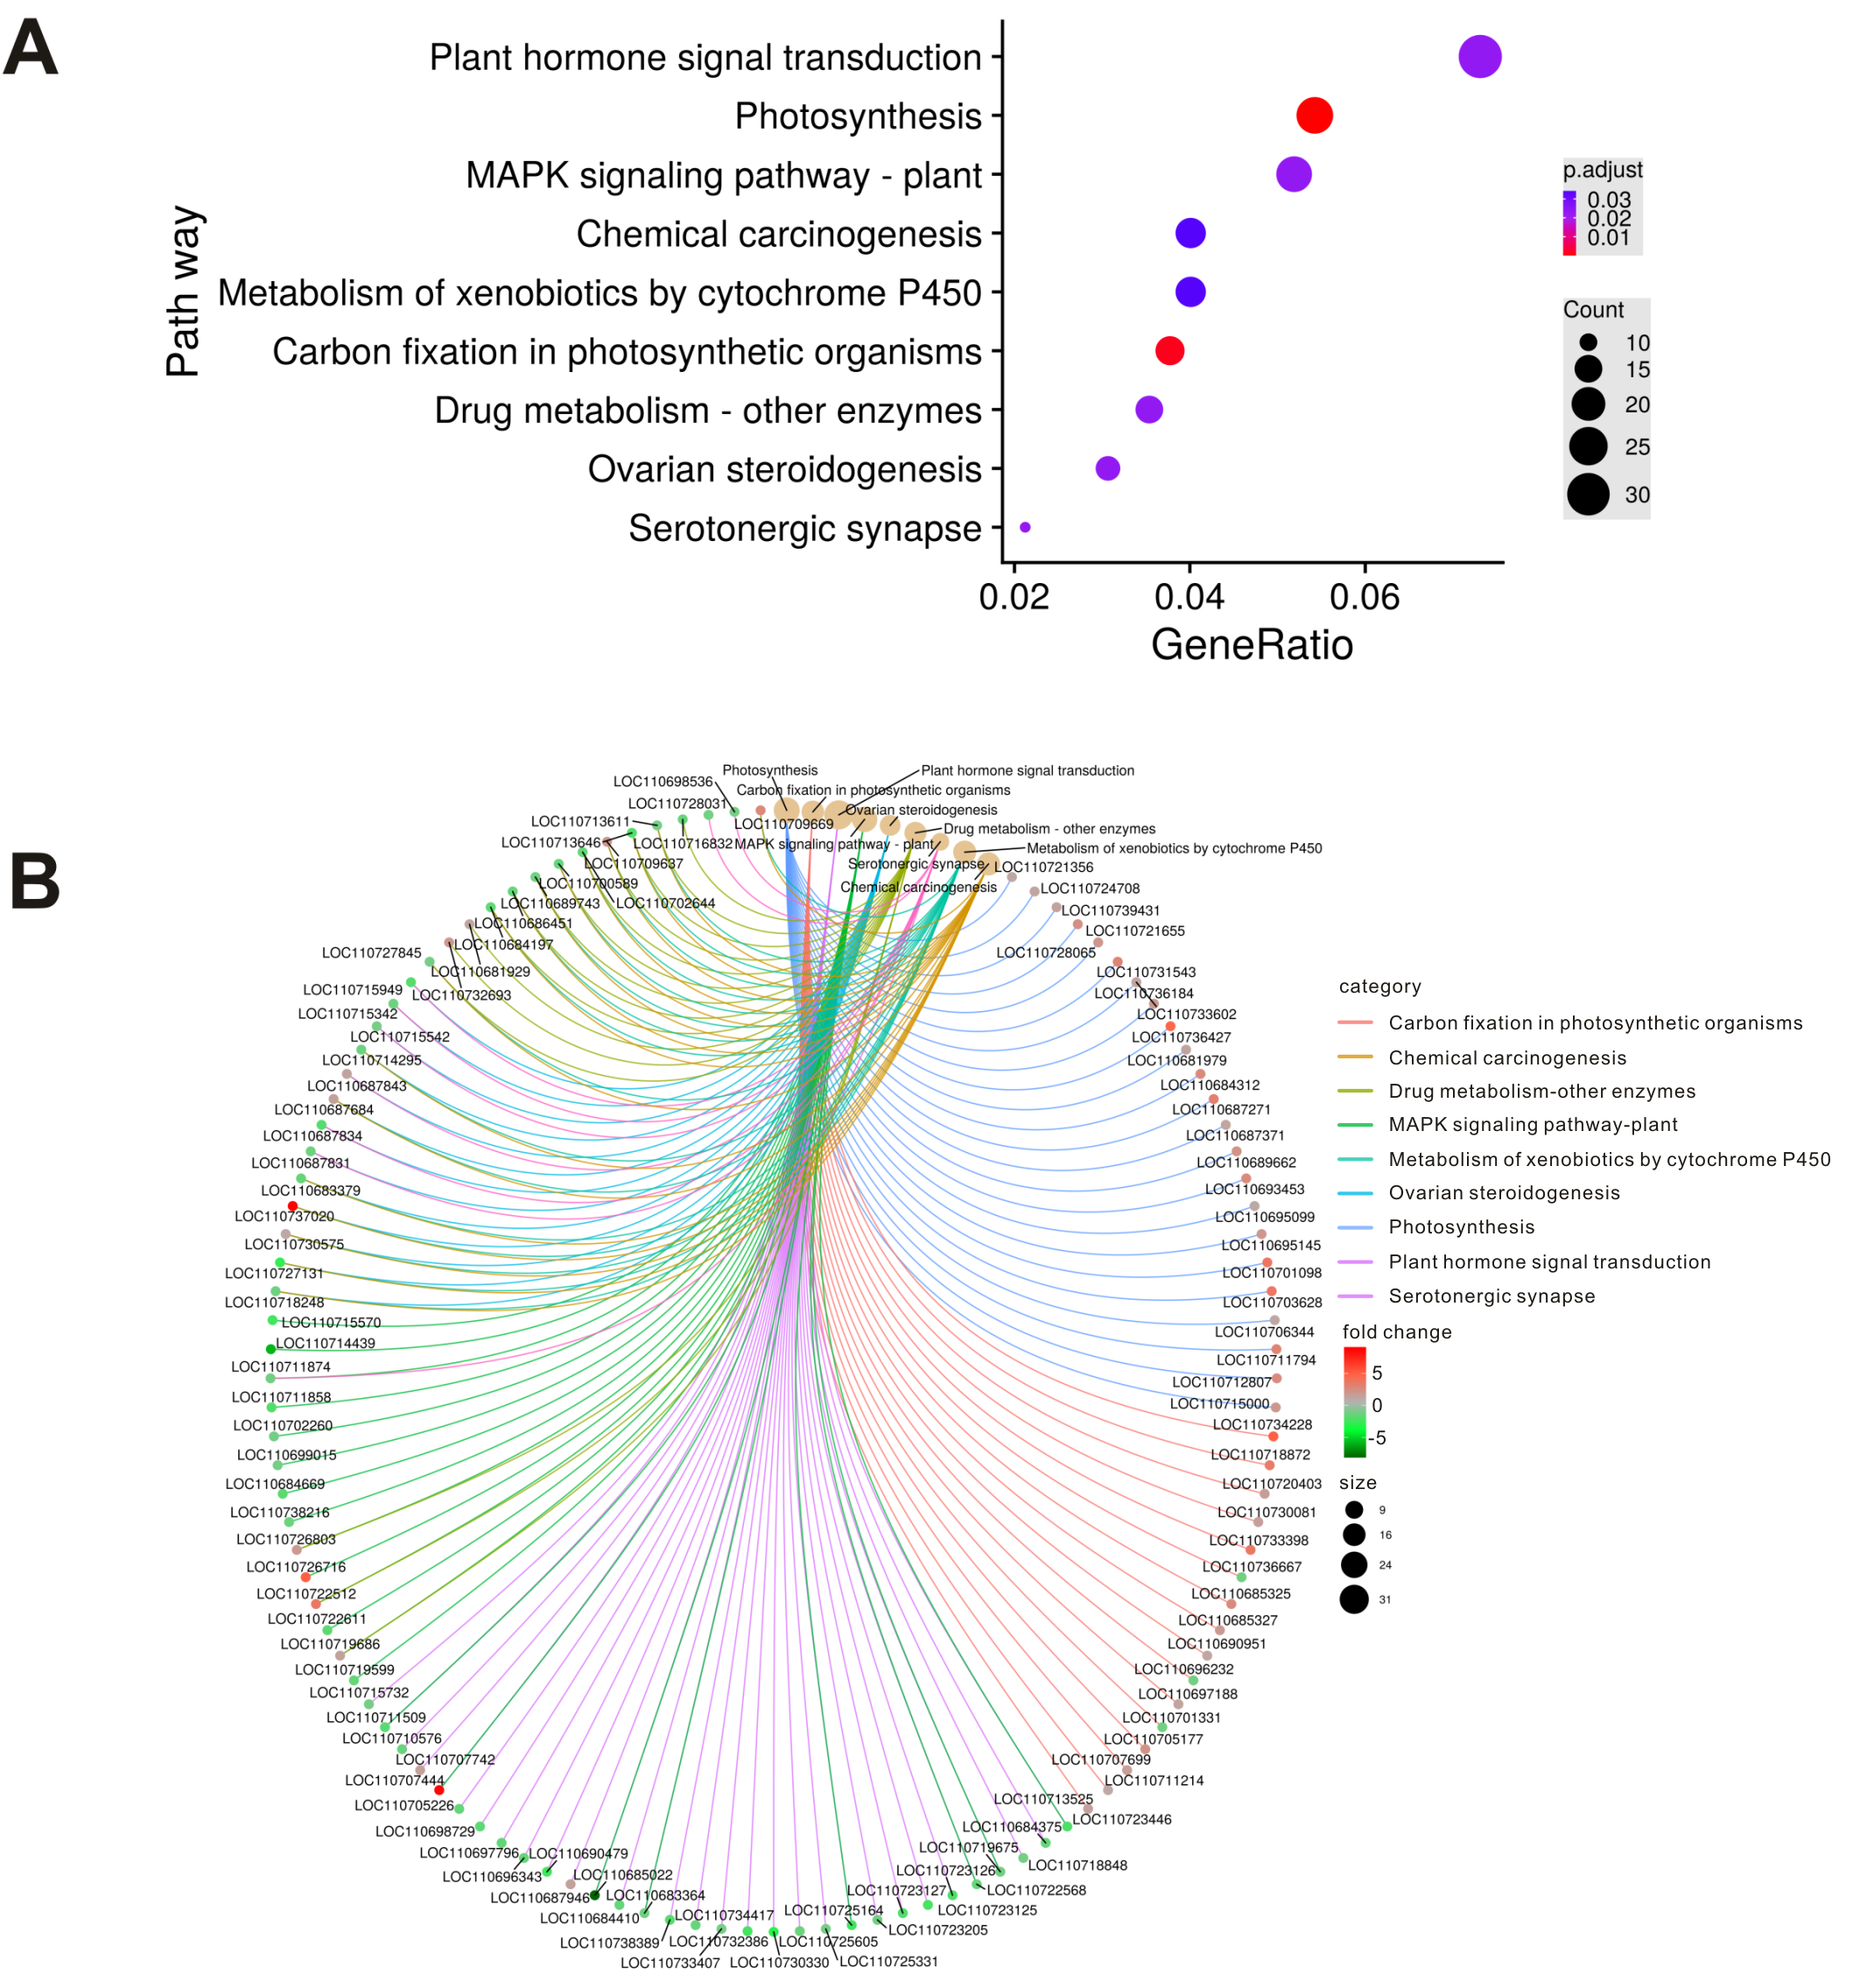


**Figure S2.** KEGG pathway analysis for 1734 DEGs. (a) Nine pathways with significant enrichment; (b) DEGs enriched in nine pathways. DEGs: differentially expressed genes.


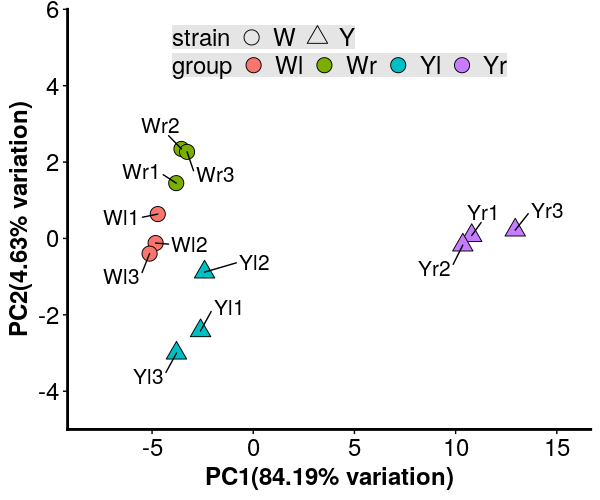


**Figure S3.** Principal components analysis (PCA)of 57 key genes. Yr: yellow quinoa fruit; Yl: yellow quinoa flower; Wr: white quinoa fruit; Wl: white quinoa flower. The number that follows sample names represent three biological repeats.
