# Supplementary material for: Bioinformatics-based Screening of Key Genes for Saponin Metabolism in Quinoa
Source: Research Square preprint supplement (doi:10.21203/rs.3.rs-139481/v1), 2021-01-07
Supplement: Supplementary file 2 [file 32703113e3b14974e86e3dca.xlsx]

## Sheet: table S3
Table S3. The detail information of component loadings for 116 genes.
geneSymbol	PC1	PC2	PC3	PC4	PC5	PC6	PC7	PC8	PC9	PC10	PC11	PC12
LOC110704633	0.122672	-0.00769517	-0.0824674	0.0106261	0.019147	0.0139596	-0.0364448	-0.0236864	-0.0190122	0.013044	-0.00853883	0.235515
LOC110702607	-0.0999998	0.0426796	0.0188466	0.0515156	-0.27213	-0.103189	0.109394	-0.173881	-0.0186499	0.0632476	-0.279664	0.066571
LOC110712327	-0.122498	0.0283832	-0.00838224	-0.0368796	-0.116521	0.0311901	0.065808	0.0725702	-0.0967198	0.0252463	0.0519209	0.044965
LOC110718473	-0.0984171	-0.0490554	0.0798712	-0.123424	0.115715	-0.031662	0.162941	-0.0592108	-0.265781	-0.00736707	-0.231839	-0.392706
LOC110718978	-0.11213	-0.0275473	-0.0568944	-0.0475231	-0.144262	0.000944451	-0.192233	0.171629	-0.0537886	-0.0387738	-0.0308936	0.0899202
LOC110719231	-0.0111547	-0.104469	-0.210534	-0.12789	0.0876749	0.0611311	-0.0325293	0.0361269	-0.0989741	0.0747945	0.110367	-0.00425931
LOC110720620	0.11913	-0.0382723	-0.00880303	-0.11592	-0.029734	-0.052121	0.0950919	0.0633633	0.124713	-0.0186292	-0.01023	-0.163105
LOC110720610	-0.07946	-0.0748532	-0.180151	0.0767588	-0.0138636	-0.0417565	0.0487214	-0.0893244	0.0361634	-0.00400671	-0.0709437	-0.164437
LOC110720854	0.115149	0.0166633	-0.0196193	0.00409449	-0.00227202	0.195075	-0.108165	-0.186548	-0.107653	0.149085	-0.0377932	-0.0423397
LOC110720886	-0.0952872	0.107072	-0.00378175	-0.0806472	0.116875	0.141697	0.0493572	0.0365257	0.0740549	-0.0890925	0.0522197	-0.145528
LOC110722040	-0.0609809	-0.0830414	-0.160089	-0.225483	0.125172	0.0398341	0.0139039	-0.0754843	0.0148499	0.01163	0.075992	0.00660547
LOC110722071	-0.0633359	-0.100213	-0.159636	0.171295	-0.0409383	-0.00826049	0.0396278	-0.0633124	0.0764555	-0.00695246	-0.15874	-0.0756194
LOC110723289	-0.0810977	0.115645	0.0450497	0.114629	-0.0381369	0.0616036	-0.0662292	0.267675	-0.0507798	-0.0593705	0.140455	-0.193003
LOC110723063	0.108071	-0.0745513	0.0554637	0.0115081	-0.0790118	0.0192553	-0.0757054	0.114772	-0.0531869	-0.0822553	-0.278108	-0.109807
LOC110723123	-0.0978038	0.0040415	-0.0621673	-0.103349	-0.287853	-0.0469332	-0.198713	0.0584924	0.146692	-0.0999628	0.0362107	-0.0567167
LOC110688193	0.123823	0.0130392	-0.0134201	-0.0724275	-0.0792015	-0.0644993	-0.00678097	-0.0048722	0.132439	-0.048124	0.00227728	-0.048532
LOC110723187	-0.0743264	-0.115161	-0.139135	0.0880763	-0.0403158	0.0139354	0.0403563	0.00188946	0.0255009	0.0304766	-0.0816563	-0.0257656
LOC110723205	0.0208593	0.166765	-0.0769434	-0.0178619	0.144885	0.0533736	0.0772765	-0.0123024	0.0727644	-0.153525	-0.115357	0.0448994
LOC110723251	-0.0721317	-0.0146271	-0.219654	-0.118152	0.0161465	-0.000698382	0.0269429	-0.0751678	0.00886754	-0.00375094	0.0823321	-0.120186
LOC110723754	0.123523	-0.0169724	-0.0264017	-0.0064096	-0.0121925	0.0511979	-0.0604961	-0.11658	-0.135518	0.0600661	-0.0959671	0.0850439
LOC110723927	-0.086109	-0.0703552	-0.0460273	-0.229474	-0.00250462	-0.066172	0.0981474	-0.0396342	-0.327409	0.156527	-0.0449129	0.193286
LOC110723661	-0.0945622	0.099427	-0.0443094	-0.05954	-0.13479	-0.0656395	0.0503408	0.0447072	-0.246782	-0.00914412	-0.00425661	-0.0551631
LOC110724283	0.12793	0.00913816	-0.0222846	-0.00391339	0.00809084	-0.000741758	-0.0415636	-0.0356635	-0.0162039	-0.00127997	0.000886934	0.016625
LOC110724297	-0.111318	-0.0272073	-0.109562	-0.0270138	-0.0656977	-0.0539985	0.0152417	-0.153157	0.0429984	-0.125378	0.136807	-0.0582411
LOC110724430	0.12142	-0.038188	-0.0417564	0.0141991	-0.0839845	0.0119048	0.0506599	-0.0148393	0.119126	0.0419763	-0.0941191	-0.0497672
LOC110724368	0.11839	-0.0467345	-0.0566516	-0.062066	-0.0498317	0.0842598	0.0913984	0.0130007	-0.01332	-0.00513145	-0.0123751	-0.0363088
LOC110727557	-0.078262	-0.118233	-0.10566	-0.144255	0.032409	0.0107552	-0.0314547	-0.0438613	0.0378492	0.000811268	0.00824555	-0.0391234
LOC110727597	0.0150542	0.177199	-0.0615208	-0.00340394	0.0838221	-0.0660143	-0.00229474	0.0416227	0.055136	0.0883567	-0.0485228	-0.0109774
LOC110727929	0.0157019	0.177055	-0.0606933	-0.0343344	0.00874827	0.016714	0.0626666	0.0664479	-0.0288727	0.167871	-0.067813	-0.0487721
LOC110728315	0.123944	0.0281456	-0.0473467	0.0124653	0.00955214	-0.0506653	-0.0360432	-0.0661527	-0.0735065	0.00892697	0.0518427	-0.0594762
LOC110729925	0.0196761	0.159532	-0.0815711	-0.0502291	0.139196	-0.101069	0.0768019	0.124455	0.0606802	0.242248	-0.0558469	0.0493635
LOC110729974	-0.0176489	0.177184	-0.0533925	-0.0337249	-0.106454	0.0103595	-0.00372853	0.0482676	-0.0307652	0.111053	0.025093	0.0983539
LOC110730003	-0.0600666	-0.0982985	-0.141209	-0.227467	0.093051	0.0583288	-0.0346025	-0.0491478	0.092903	0.0759504	0.0678649	0.0477164
LOC110730200	-0.0909389	-0.0177416	-0.156397	0.0853935	-0.219921	-0.00867109	0.0262509	-0.017193	-0.0819466	0.109517	-0.128421	-0.0051689
LOC110732545	0.116678	-0.0261453	-0.0758139	0.0649783	-0.0372183	0.109265	-0.0829223	-0.131157	-0.013991	-0.0176939	-0.066691	-0.071753
LOC110730799	-0.0618313	-0.0846409	-0.11948	-0.288727	0.137448	0.0407089	-0.0185856	-0.00699304	-0.0116963	0.000922665	0.114593	0.0620778
LOC110731011	0.0126634	0.174949	-0.0760409	0.000362384	0.0942613	0.063644	0.0349971	0.0210051	0.05818	0.0482157	-0.0550076	-0.117616
LOC110733409	-0.00108273	0.17806	-0.0654427	0.00951464	0.0216862	0.0676937	0.037853	-0.0280494	0.0157728	0.183629	-0.007594	-0.215621
LOC110733906	0.109338	-0.070036	-0.096128	-0.00253296	-0.00286656	0.0165897	-0.0515003	0.0380309	-0.108238	-0.00862202	0.0261285	0.0669583
LOC110736096	0.118688	0.00696919	-0.04748	-0.0842565	-0.055186	0.0511143	0.187918	0.0921825	0.0149764	-0.067236	-0.00781106	0.0609701
LOC110738473	-0.0737882	-0.0277164	-0.184113	0.114088	0.082709	0.0634103	0.0928791	-0.129246	0.120805	-0.294837	-0.200099	0.1046
LOC110737629	0.0119639	0.176887	-0.0754403	-0.0239685	0.00638787	-0.000417143	-0.0350369	-0.0324605	-0.0557958	-0.113305	0.105499	-0.0791886
LOC110739397	-0.0706119	-0.113629	-0.127222	0.0416034	0.00398129	0.0858492	-0.096727	0.23244	0.0430412	-0.00354662	-0.0513102	0.133882
LOC110739420	0.0146454	0.160874	-0.0702807	-0.0772407	-0.206439	-0.0934482	0.00940045	0.0115482	-0.105847	-0.153137	0.0198153	0.091118
LOC110681830	0.124481	0.0228525	-0.0320666	-0.0472127	-0.0271716	-0.0820272	0.0362273	-0.000797184	0.0413846	-0.10726	-0.0366067	0.0858943
LOC110685011	-0.0817121	-0.116577	-0.117648	0.0350487	0.0174884	0.026947	0.0102381	0.0968488	-0.0278233	-0.031001	0.140401	-0.0946646
LOC110686100	0.103112	-0.0474648	0.0555901	-0.111749	-0.178895	0.105555	0.230872	0.0236464	0.0234219	-0.0315976	0.0346109	-0.157647
LOC110686183	0.115082	-0.0355966	-0.0500165	-0.0670326	-0.0717469	0.135018	0.0681807	0.143187	-0.116241	0.0990656	0.0205589	-0.0331875
LOC110688066	0.111748	-0.0125871	-0.109755	-0.0224193	0.0434172	-0.151077	0.0260879	0.0348622	0.0308793	0.18423	0.096485	0.0794723
LOC110689971	-0.0762735	-0.0842548	-0.181097	0.0687906	-0.0131349	0.0198386	0.0638541	0.0319708	-0.00116968	0.054344	-0.0109568	-0.130575
LOC110691084	0.12228	-0.0177428	-0.0456873	-0.0173941	-0.0564908	0.117253	0.0192702	-0.110249	-0.0599981	-0.0232209	0.0239916	0.0595547
LOC110691090	0.124305	-0.0218771	-0.0279818	-0.0587921	-0.0569437	0.0674642	0.0823588	-0.0324171	-0.00308574	-0.00165814	0.00249985	-0.0376455
LOC110695224	0.116163	0.0465928	-0.0492053	-0.00873465	0.103041	-0.143722	-0.0909565	-0.0494152	0.0410896	-0.0209584	0.00180576	0.053667
LOC110697315	0.000958672	0.171871	-0.0601854	-0.0114087	0.140422	0.102093	0.0475319	-0.0320614	0.0466256	-0.183219	-0.071356	0.113907
LOC110698640	0.118006	-0.0261228	-0.0280015	0.002891	-0.117194	0.0405746	0.0553883	0.138759	-0.175212	-0.161976	-0.0357477	0.063163
LOC110699995	-0.0739778	0.0264178	-0.21653	-0.0910449	-0.0761389	-0.0218378	0.00298553	-0.0310459	-0.0406935	0.000466293	0.0833247	-0.0342
LOC110700129	0.115799	-0.0531908	-0.0691662	-0.0386142	-0.0293434	0.0964259	0.0469619	0.0824557	-0.0510628	-0.066662	-0.0558028	0.0974434
LOC110700249	0.12631	-0.0162565	-0.0353648	-0.0296668	0.00212332	0.0506099	-0.00272804	-0.0509726	-0.0228744	-0.0535275	0.00331326	0.0515893
LOC110702314	0.120029	-0.00426728	-0.0175932	-0.0168166	-0.10231	0.150553	0.160507	0.00105017	-0.00397473	0.0450468	0.0510841	0.0984861
LOC110702748	0.020873	0.176938	-0.0682476	-0.0161207	0.0146866	0.00978808	-0.00697512	0.00487269	-0.00682294	0.159989	0.00974816	-0.0153154
LOC110703333	-0.0889604	0.00815355	-0.117584	0.209622	-0.0975668	-0.0548985	0.191529	-0.0822596	0.0668791	-0.0440597	0.332651	-0.0337331
LOC110702028	-0.096012	-0.0921628	-0.102441	0.0796632	0.0486597	-0.0356167	0.0207689	0.0274805	-0.0931426	-0.111824	-0.158796	-0.0791061
LOC110706808	0.121093	-0.035247	-0.0562446	0.0429127	-0.0128659	-0.0338538	-0.0614944	-0.1211	-0.0102488	0.0425746	0.0345303	-0.0413501
LOC110706887	0.124965	-0.0171101	-0.0460684	0.03671	-0.0417259	0.00820655	-0.062209	0.0596887	0.00632121	0.035338	-0.0405938	0.0333509
LOC110708189	-0.103353	-0.0691342	-0.00414185	-0.140341	-0.000576813	-0.114559	0.148677	-0.219728	0.00308964	0.038983	-0.030144	0.0711376
LOC110707815	0.0912746	-0.0858976	-0.00739935	-0.0402532	-0.170767	0.202605	0.226956	-0.0829673	0.0862874	-0.0349731	0.0132576	-0.0465412
LOC110707838	0.122203	-0.0162136	-0.0262555	0.0232476	-0.143686	-0.0309094	-0.00742792	-0.0485507	-0.0495358	-0.164845	-0.00565011	-0.104098
LOC110709155	0.119974	-0.00591469	-0.0507182	-0.0325627	0.0937269	0.055676	-0.00400882	0.0338195	-0.0292836	-0.296002	0.0237316	-0.136532
LOC110713876	0.119787	0.0510987	-0.0608019	-0.0113941	-0.0327222	0.0328216	-0.0210887	-0.0616317	-0.0182548	0.0250704	0.046784	-0.0741144
LOC110711270	-0.102289	-0.0498422	-0.0127602	-0.239273	0.0121428	0.0383086	-0.0584371	-0.125106	0.082168	0.0316589	-0.243351	0.0443528
LOC110712195	0.0183358	0.165117	-0.0822183	-0.052142	-0.111983	-0.164007	-0.0163919	0.0706751	-0.0199984	-0.0749077	-0.0146483	0.0290951
LOC110707468	0.0204999	0.174269	-0.089953	-0.0153769	-0.00445405	-0.0346469	-0.0139517	0.0139228	0.00564289	0.0125426	-0.00106189	0.0217293
LOC110713374	-0.107251	-0.0705652	0.0460275	-0.145491	0.0201891	0.0811327	-0.010008	0.0241411	-0.165771	0.0778569	-0.0437757	-0.00784451
LOC110715242	0.115168	-0.0643178	-0.00649052	0.0614836	-0.0400115	-0.0496416	-0.163446	0.0566061	0.0516925	0.0472556	-0.006642	-0.118005
LOC110718054	0.119816	0.0400378	-0.0182671	0.00640628	-0.0350339	0.133626	-0.0616639	-0.1241	-0.071338	-0.0540622	0.0867478	0.148476
LOC110718364	0.014482	0.169463	-0.0638861	0.00926655	0.138183	0.13213	0.0265372	-0.00379193	0.0425409	-0.15852	-0.0958746	0.0548516
LOC110718478	-0.0150082	0.170002	-0.0725581	-0.0397771	-0.149077	-0.0445153	-0.0323547	0.0343342	-0.0609987	-0.143352	0.0658399	0.0730574
LOC110718928	-0.0123179	0.171273	-0.0705161	-0.0406356	-0.16097	-0.0462757	-0.0167871	0.0457007	-0.0569836	-0.0377424	0.0614753	0.0745772
LOC110718422	-0.065389	0.00393073	-0.0118325	-0.277048	-0.203315	-0.00695787	-0.308488	-0.0760802	0.345649	-0.0741905	0.0458022	-0.0976928
LOC110718755	0.0316615	0.175013	-0.0670516	-0.00939036	-0.0181958	0.0520081	0.00145438	-0.00777055	-0.00916277	0.0111759	-0.0123352	0.00795407
LOC110718848	0.014862	0.162861	-0.0873402	-0.0933032	-0.166519	-0.0416522	0.0296369	-0.00810605	-0.124878	-0.0373925	0.000513893	-0.0692345
LOC110719105	0.0267197	0.168043	-0.0667753	0.0252285	0.127728	0.0826611	-0.0746199	-0.0994336	-0.0215862	-0.104813	-0.00779397	-0.0542965
LOC110719131	-0.0443934	0.110724	-0.19436	-0.0673794	-0.100885	0.00402346	-0.0196574	-0.019227	-0.0448436	0.0308996	0.0755218	-0.118993
LOC110719483	-0.0970497	-0.0877045	-0.070244	-0.0482113	-0.0844696	0.0802392	-0.173596	0.0139273	0.190004	0.0423871	-0.117118	0.12121
LOC110719550	0.0917751	-0.0195367	-0.0510815	-0.0520937	0.121623	-0.366747	0.137668	-0.165919	-0.0724224	-0.152534	0.0947333	0.00638836
LOC110719675	0.024725	0.16911	-0.0745942	0.0196231	0.112085	0.114268	0.00796523	-0.0534416	0.0170888	0.102351	-0.0209028	0.00451044
LOC110719686	0.116283	-0.0318713	-0.0821618	-0.011577	0.0970424	-0.0793071	-0.0766776	-0.102887	-0.045894	-0.0553602	0.0295251	-0.0595882
LOC110719246	0.116105	-0.0636419	-0.00192977	0.0209901	-0.0708325	0.0883627	0.130445	0.0728858	-0.0319085	-0.01678	0.00308536	0.0213611
LOC110719988	0.106194	-0.0556701	-0.0517808	0.0552558	0.0693041	-0.263215	-0.0725915	0.065747	-0.0033198	0.0884631	-0.000735003	-0.148875
LOC110720043	0.106447	0.0167102	-0.0070272	-0.063375	0.0163856	-0.305454	0.0935992	0.181138	0.128949	0.0158853	-0.0494469	-0.0073922
LOC110720406	0.0130178	0.16552	-0.112474	0.0434413	0.0912226	-0.00939595	-0.0661471	0.0191638	-0.00847194	0.110578	0.00785701	-0.032333
LOC110720548	-0.0734912	0.135909	-0.0797996	-0.0349525	-0.07215	0.0359688	-0.095259	0.0137722	0.00623949	-0.0610455	-0.215952	0.0370827
LOC110721015	0.0961383	-0.0409723	-0.0522291	-0.16757	0.0360459	-0.19984	0.159176	0.241675	0.12909	-0.0132593	-0.101825	0.0311002
LOC110721225	-0.0437029	0.0264942	-0.234534	0.163152	0.0927609	0.040047	0.0731492	0.0439235	0.088849	-0.0559288	-0.155836	-0.0216683
LOC110721433	0.111135	-0.0358074	-0.107796	0.0572366	0.116308	0.0234296	-0.108774	0.0256884	-0.00296347	-0.00234243	-0.0242568	0.029645
LOC110721284	-0.0179047	-0.111269	-0.203224	0.0923977	0.0103234	0.040735	-0.0205513	0.175027	-0.1178	0.0350994	-0.0372733	0.0679585
LOC110721610	0.117344	-0.0477741	-0.0335163	-0.0653429	-0.0512579	0.106249	-0.0784686	0.100571	0.0923803	0.0847205	-0.0386551	-0.087494
LOC110721684	-0.0576334	-0.10518	-0.177336	0.13866	-0.0157539	-0.00569863	0.0594806	-0.00258931	-0.0118032	0.0396017	-0.0612065	0.162682
LOC110721946	0.123672	0.0165021	-0.0352239	-0.00879621	-0.0385362	0.10084	0.0685552	-0.00469613	0.104551	0.0826507	0.0572439	-0.0833487
LOC110721947	0.121161	-0.0467263	-0.0589462	0.0076771	-0.00974612	-0.00328441	-0.0546551	-0.0386424	-0.0250985	0.0181781	0.0192419	-0.119288
LOC110721949	0.118265	-0.0536715	-0.0611156	0.00221277	-0.0436601	0.0868703	0.00363125	-0.0387707	-0.0393621	0.0140523	0.0601867	-0.0494277
LOC110721948	0.112186	0.00441103	0.0268945	-0.01193	-0.0713621	0.129097	0.154922	0.0307823	0.285332	0.222637	0.0263061	0.0286147
LOC110721992	0.116092	-0.0434449	-0.0456954	-0.0237244	0.0144891	-0.165117	0.0184473	0.153256	0.0600553	-0.0144253	-0.0898941	0.0241353
LOC110722153	-0.0360005	-0.0210991	-0.231912	0.197291	-0.0952796	-0.0836167	0.0438169	-0.0821006	0.0772883	0.144294	-0.0455163	-0.0569439
LOC110722155	0.115821	-0.0574711	-0.0651302	-0.0595281	-0.0146943	0.0296915	-0.0103501	0.121536	-0.0622385	-0.0128608	-0.0173913	-0.0604935
LOC110722453	0.12475	-0.0382967	-0.022956	0.0117091	-0.0507102	-0.00637356	0.0414561	-0.0369519	0.0215831	-0.0307799	-0.0244781	-0.0225751
LOC110722379	0.105851	-0.057655	-0.130023	0.0500792	-0.0130349	-0.0291475	0.0142183	-0.0343225	0.0272894	0.0300235	-0.00270054	0.110956
LOC110722418	0.10769	-0.0659807	-0.0898939	-0.0235548	0.0525285	0.00782292	-0.158103	0.0242801	-0.116917	0.0077073	0.0591072	0.0593159
LOC110722595	0.125721	0.00351805	-0.0134331	0.0462538	0.0526528	0.0189075	-0.0287985	0.108737	-0.0495317	-0.0963836	0.000320566	0.00922619
LOC110722628	-0.0678218	-0.099307	-0.127434	-0.0810463	0.137937	0.113101	-0.0873691	0.265503	-0.0494565	-0.107256	-0.00187137	-0.0979051
LOC110722568	0.0116477	0.17899	-0.0662164	-0.00474728	0.0585481	0.0325273	0.0222955	0.0244546	0.0315571	0.0908539	-0.0333667	0.0482997
LOC110722512	0.104636	-0.0826411	-0.0756423	0.00553124	0.00276561	-0.0973388	-0.127914	-0.0853415	-0.0828697	0.0576886	0.0252436	-0.107011
LOC110722729	0.109305	-0.0435349	-0.0522412	0.106557	-0.0311988	-0.166758	-0.196347	-0.0709707	-0.0586521	0.035302	-0.050674	-0.0182148
LOC110722760	0.118265	0.0214607	0.0103181	0.00177714	-0.00111512	0.0230421	-0.21198	-0.193163	-0.0550036	0.0171535	-0.00317813	-0.0184831
LOC110722795	-0.0825058	-0.10472	-0.0884259	0.148172	0.0294037	-0.0121576	0.123481	0.0177814	0.069437	-0.0614149	0.311218	0.11878
LOC110722910	0.107819	-0.0283222	-0.0116255	-0.226734	0.0518405	-0.0875209	0.122907	-0.0677876	0.0808522	-0.0770732	-0.101073	0.0387396
